# Supplementary material for: Nitrogen-mediated metabolic patterns of susceptibility to Botrytis cinerea infection in tomato (Solanum lycopersicum) stems
Source: PubMed Central journal article supplement (PMC9867679; doi:10.1007/s00425-022-04065-0), 2023-01-21

# SUPPLEMENTARY MATERIALS

## Nitrogen-mediated metabolic patterns of susceptibility to *Botrytis cinerea* infection in tomato (*Solanum lycopersicum*) stems

Nathalie LACRAMPE<sup>1,2</sup>, Sophie COLOMBIE<sup>3</sup>, Doriane DUMONT<sup>1</sup>, Philippe NICOT<sup>4</sup>, François LECOMPTE<sup>1</sup> and Raphaël LUGAN<sup>2,\*</sup>

<sup>1</sup> PSH unit, INRAE, F-84914 Avignon, France

<sup>2</sup> UMR Qualisud, Avignon Université, F-84916 Avignon, France

<sup>3</sup> UMR 1332 BFP, INRAE, Univ Bordeaux, F-33883 Villenave d'Ornon, France

<sup>4</sup> Plant pathology unit, INRAE, F-84140 Montfavet, France

\* For correspondence. E-mail [raphael.lugan@univ-avignon.fr](mailto:raphael.lugan@univ-avignon.fr). Tel +33 4 90 84 22 06

[nathalie.lacrampe@alumni.univ-avignon.fr](mailto:nathalie.lacrampe@alumni.univ-avignon.fr); [sophie.colombie@inrae.fr](mailto:sophie.colombie@inrae.fr); [doriane.dumont@inrae.fr](mailto:doriane.dumont@inrae.fr); [philippe.nicot@inrae.fr](mailto:philippe.nicot@inrae.fr);  
[francois.lecompte.2@inrae.fr](mailto:francois.lecompte.2@inrae.fr); [raphael.lugan@univ-avignon.fr](mailto:raphael.lugan@univ-avignon.fr)

**Supplementary Fig. S1: GC-MS identification of galactinol and raffinose in the stem of tomato plants.** The identification level of each molecule is indicated between brackets after its name. (a) Extracted ion chromatogram 204 and mass spectra from pure galactinol standard solution and tomato stem polar extracts; full spectra and zooms on high m/z are shown. (b) Tentative interpretation of ion 523 in the galactinol mass spectrum as the myoinositol-5TMS moiety. (c) Extracted ion chromatogram 361 and mass spectra from pure raffinose standard solution and tomato stem polar extracts.

(a)

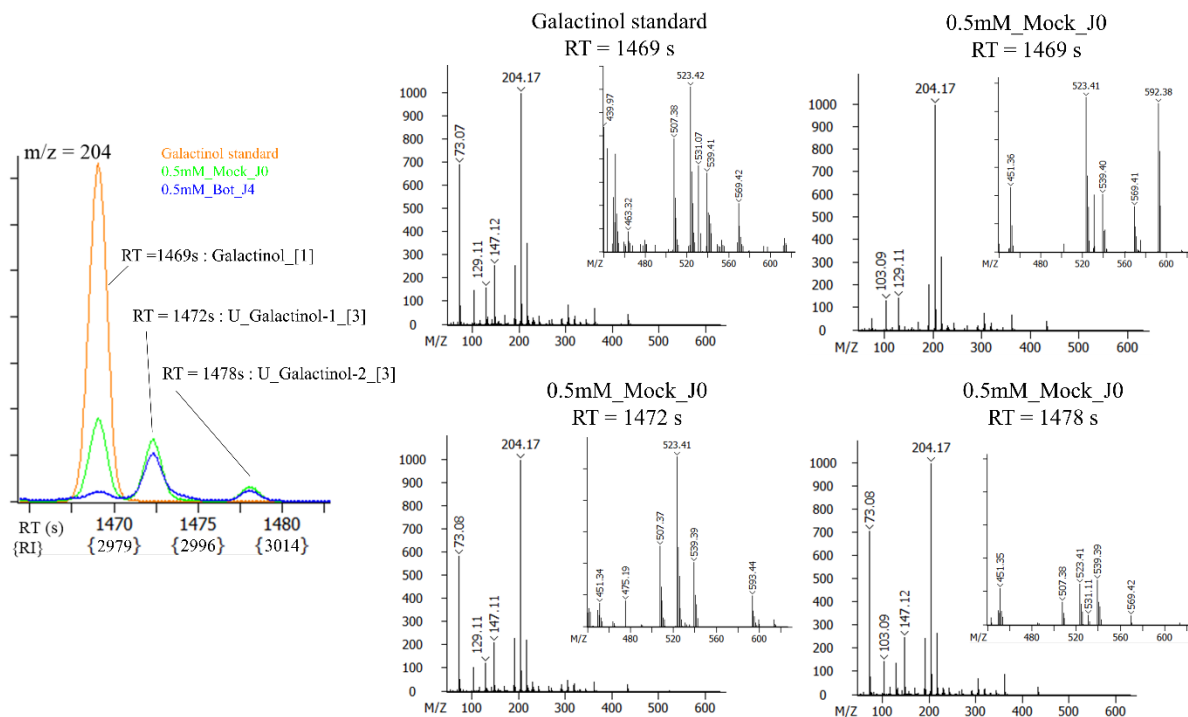

(b)

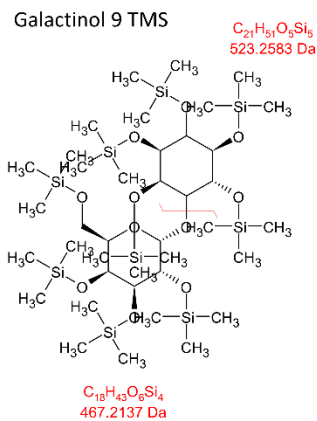

(c)

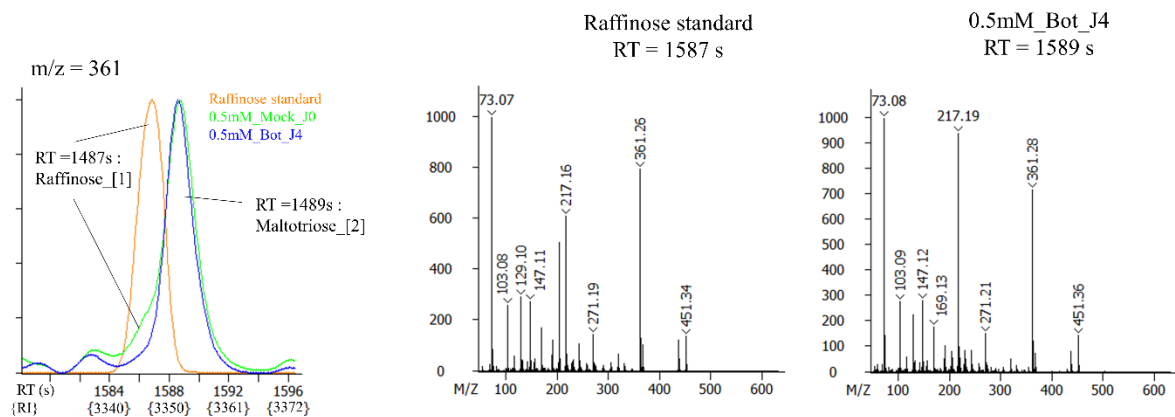

**Supplementary Fig. S2: Metabolites and physiological variables over time in the stem of tomato plants grown upon five levels of N supply and inoculated with mock or *B. cinerea*.** Physiological and metabolic variables measured over 7 days on symptomless tomato stem sections sampled from plants fertilized with five different nitrate concentrations and inoculated with *B. cinerea* or mock solution. The differences between mock- and *Botrytis*-inoculated plants were tested at each time point with a Mann–Whitney test. Significant differences are indicated by \* ( $0.01 < p\text{-value} < 0.05$ ) and \*\* ( $p\text{-value} < 0.01$ ). Black dots and solid lines: mock-inoculated plants; white dots and dotted lines: *Botrytis*-inoculated plants.

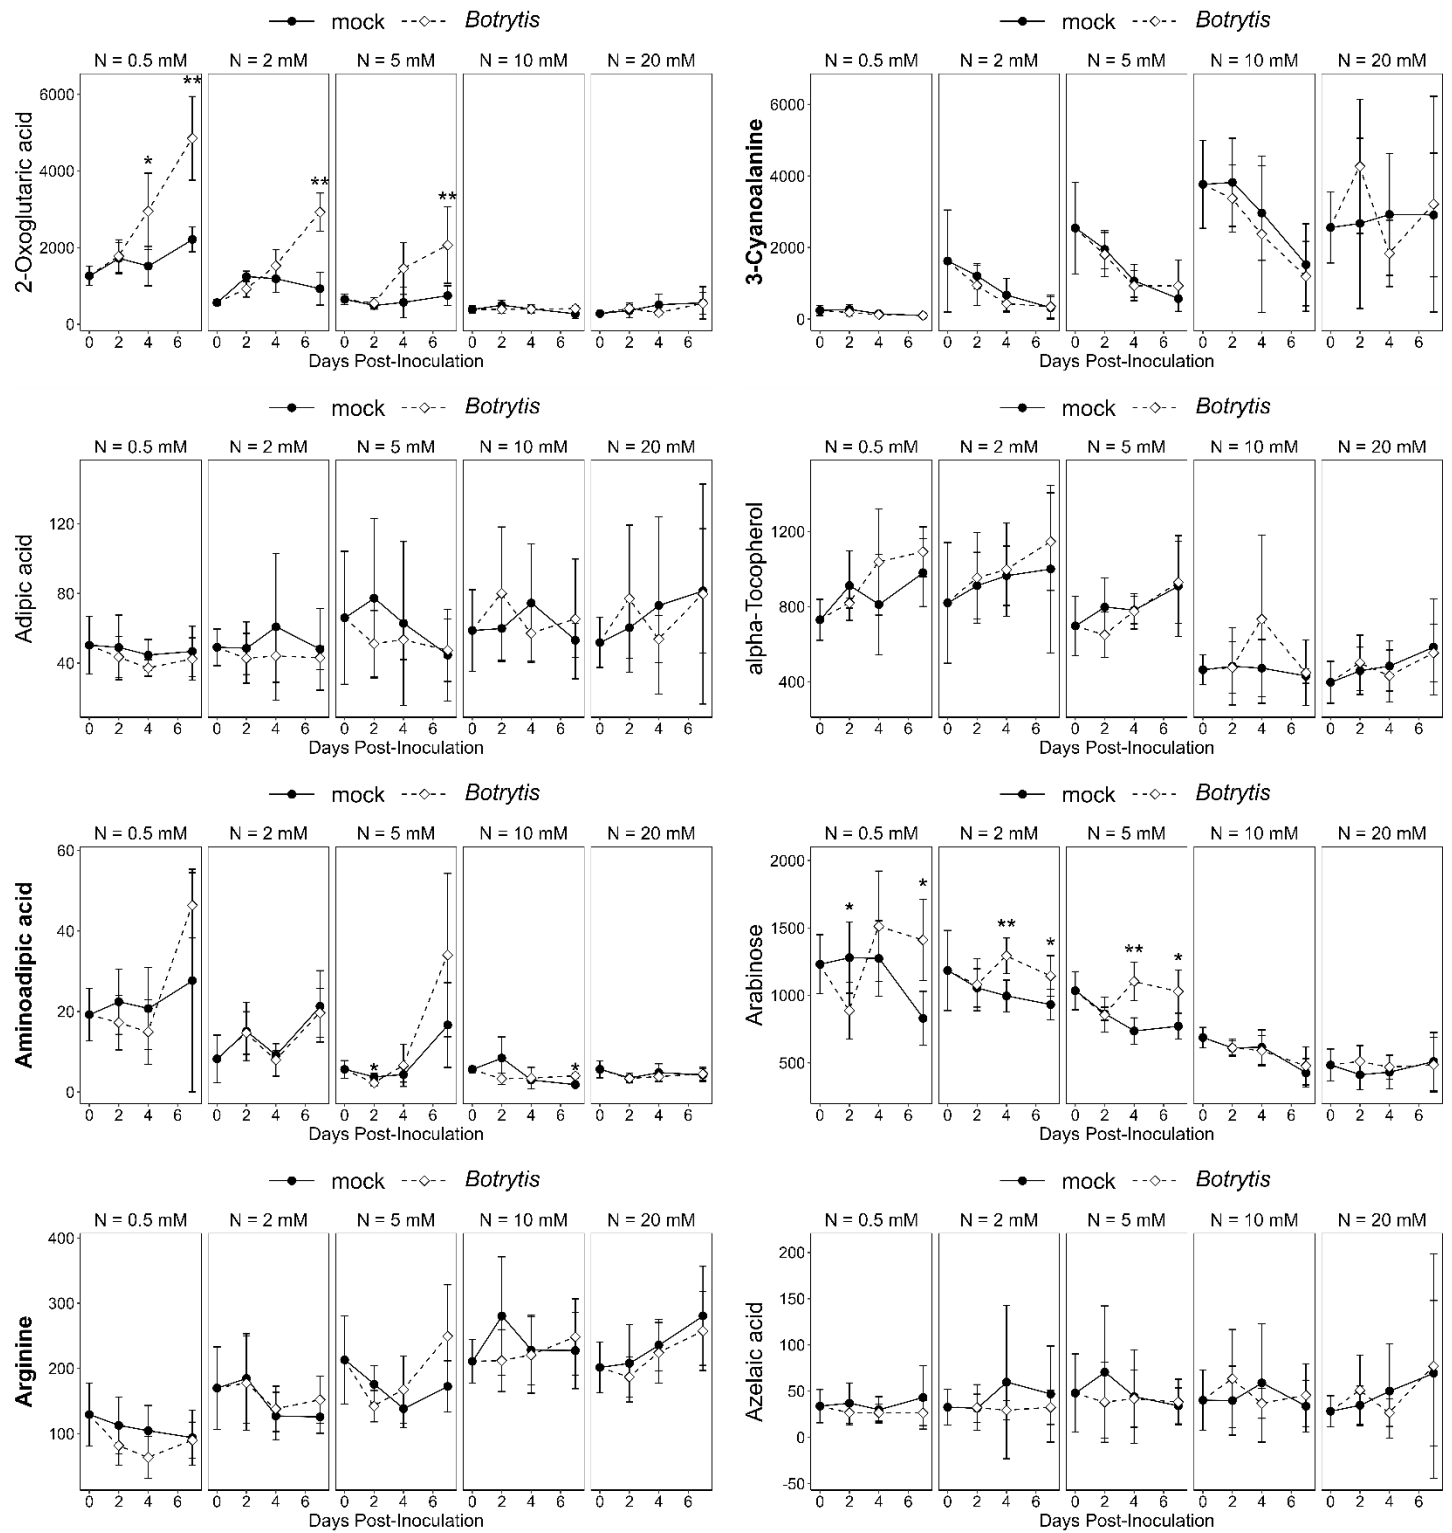

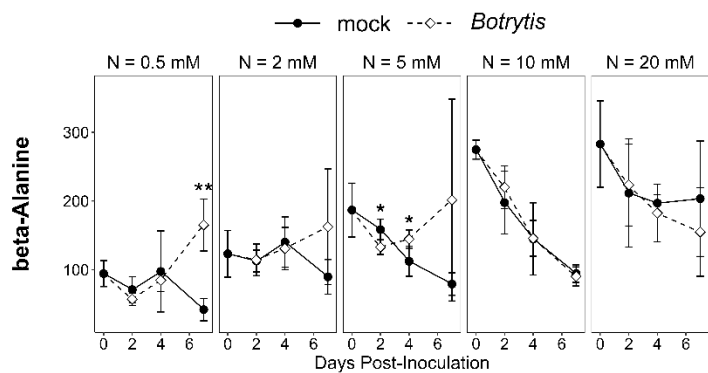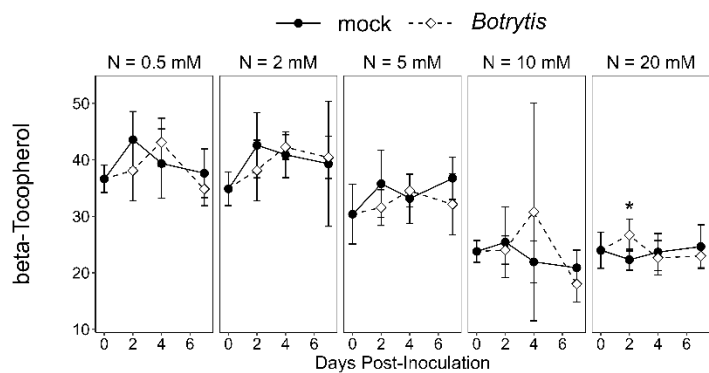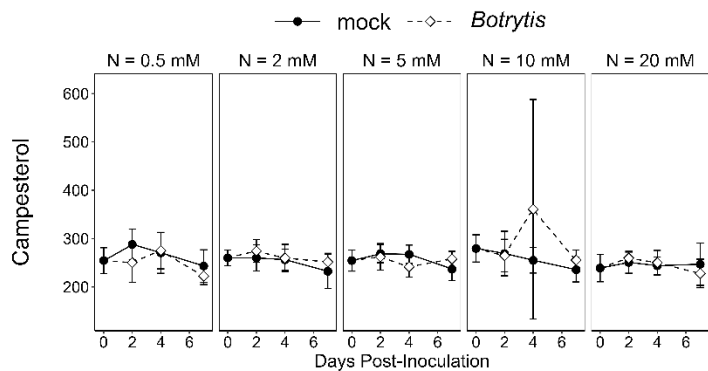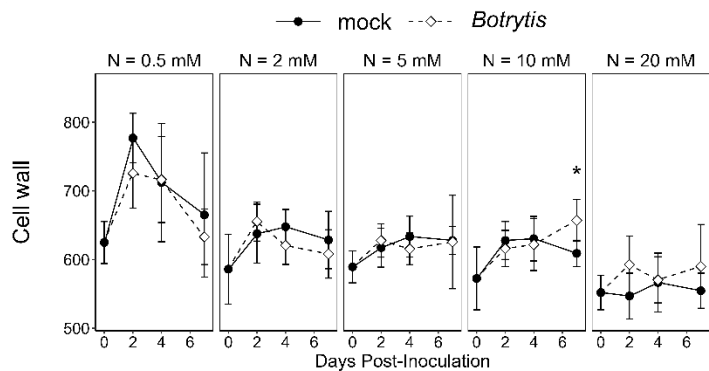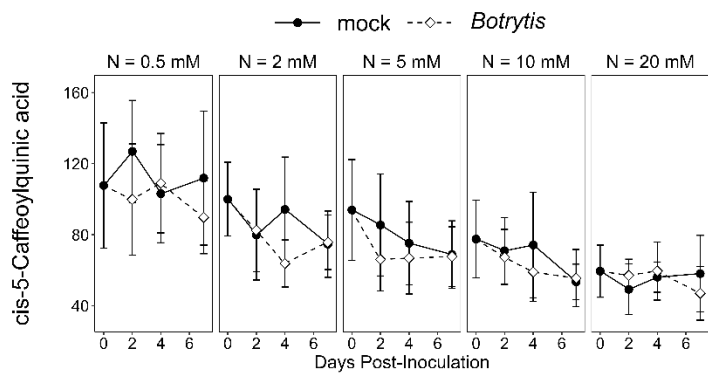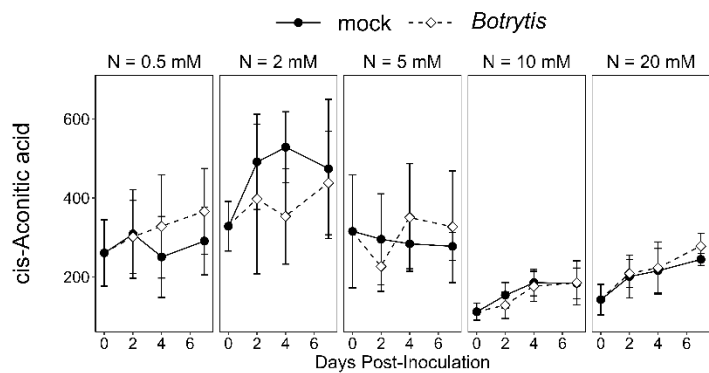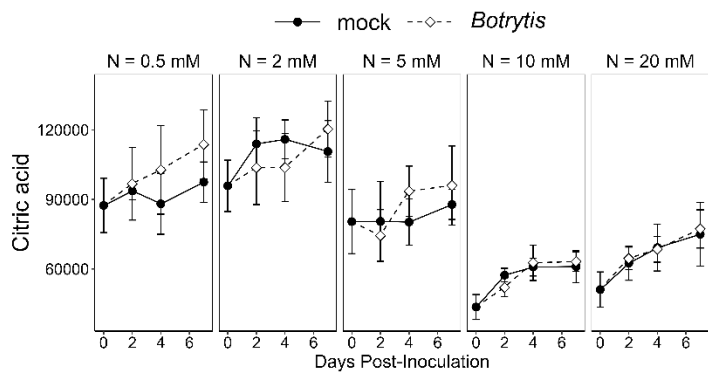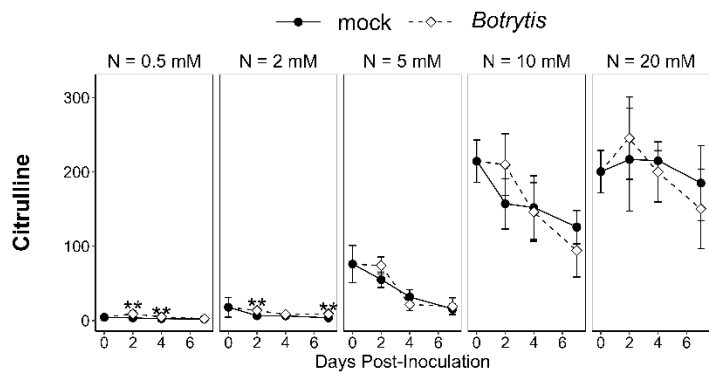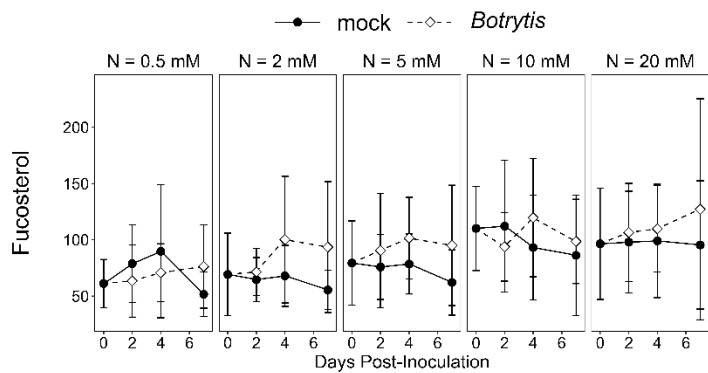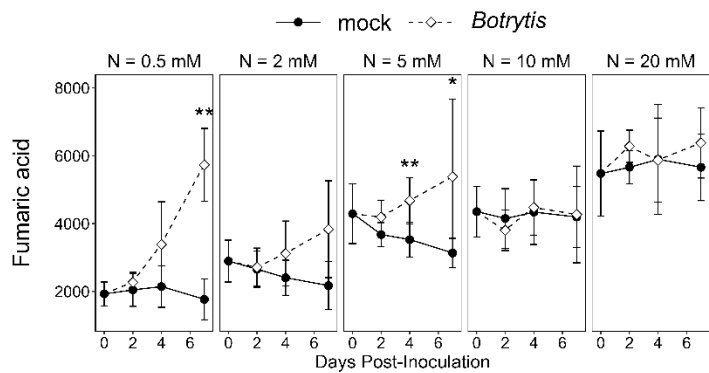

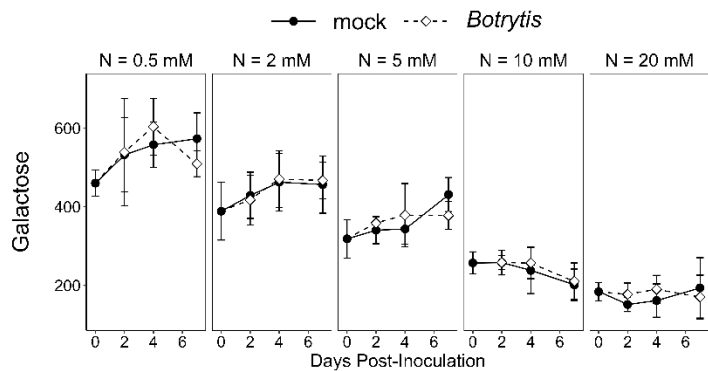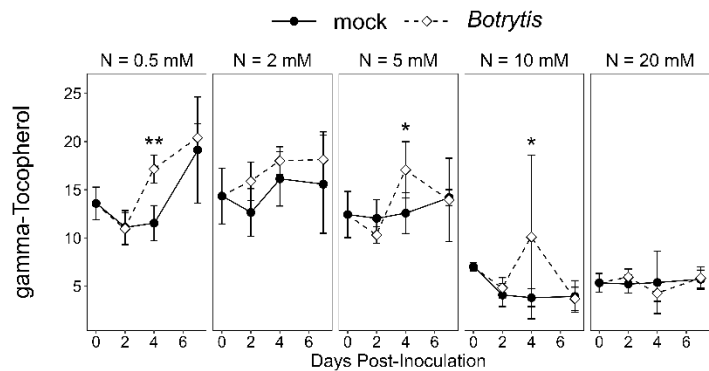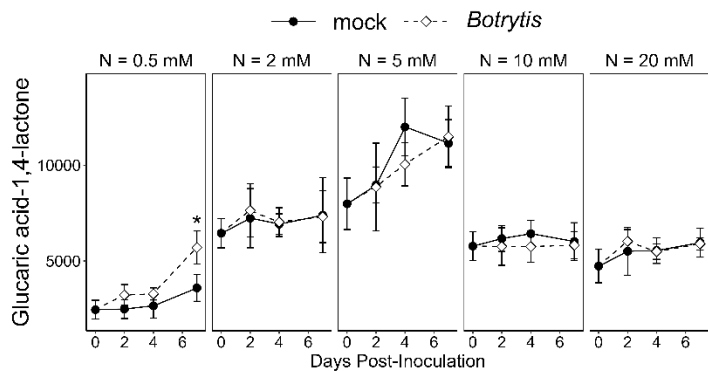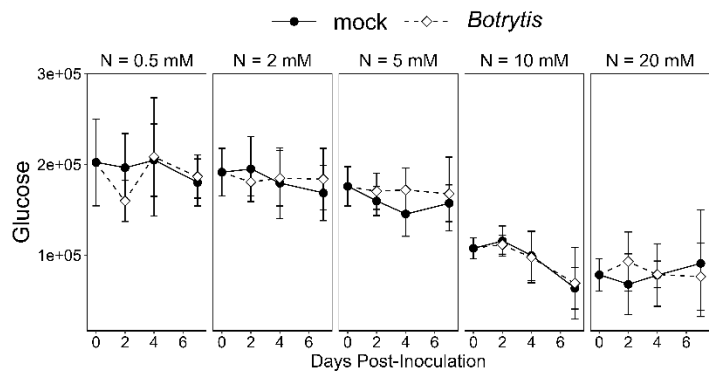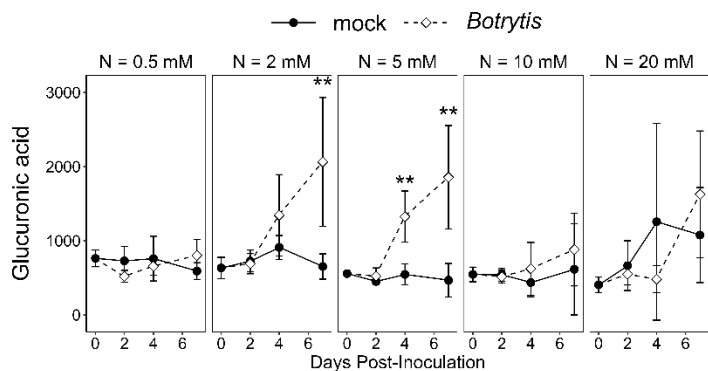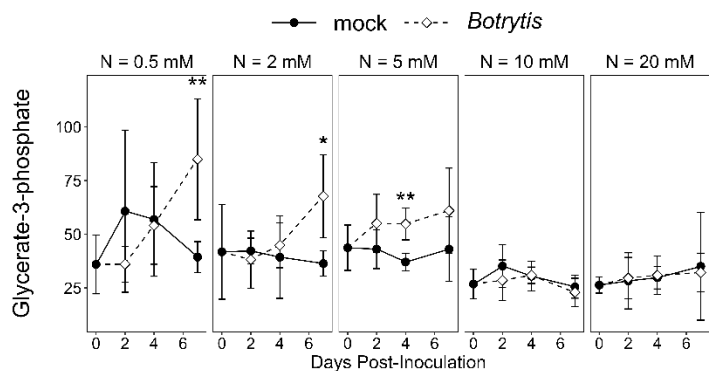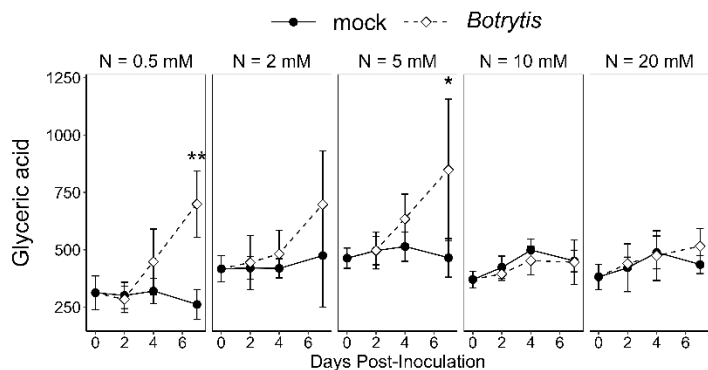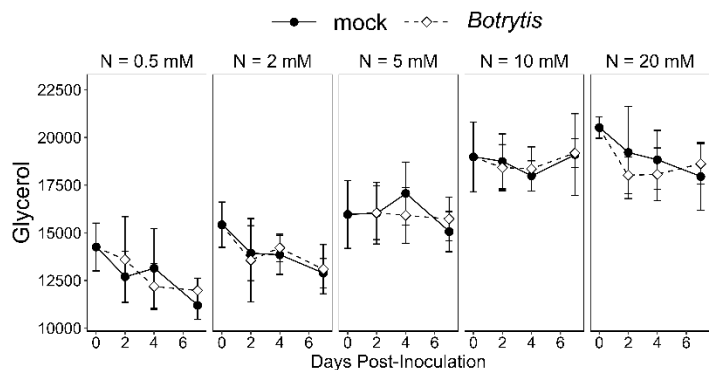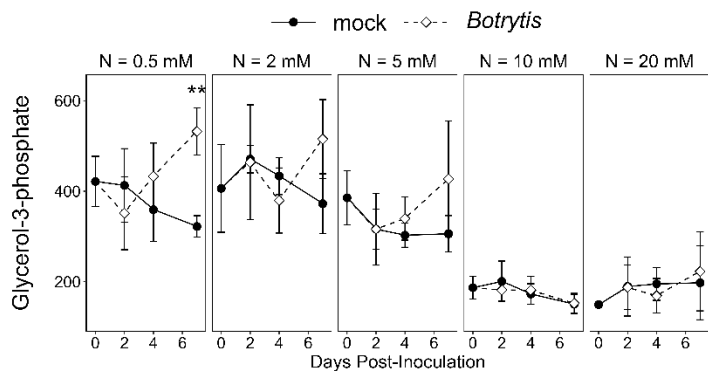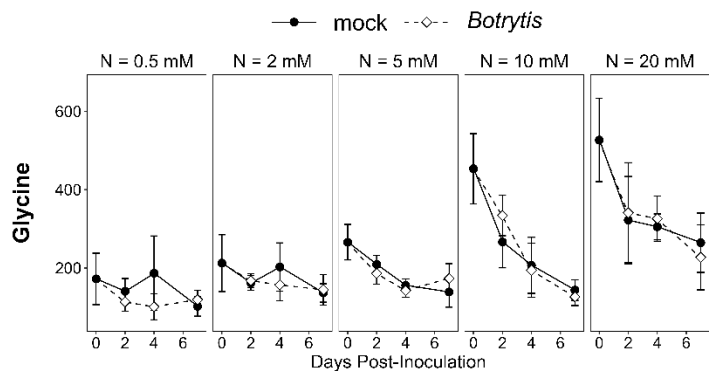

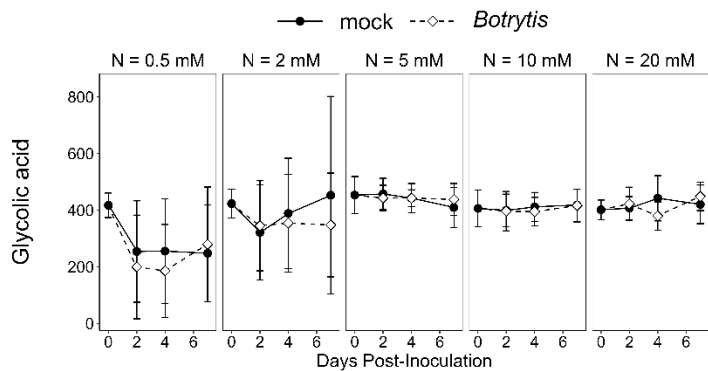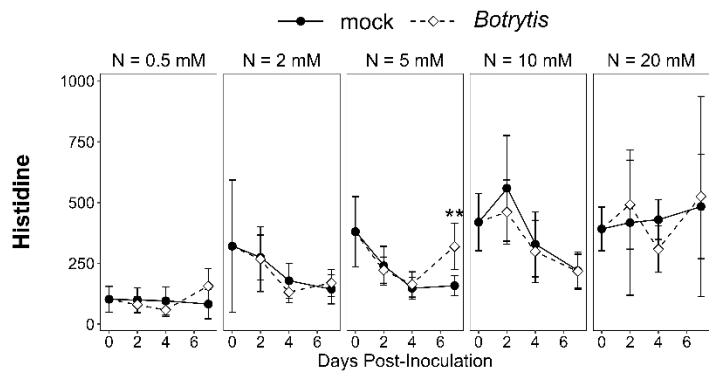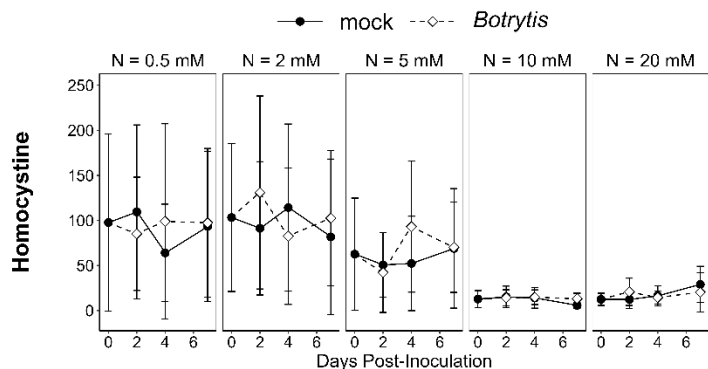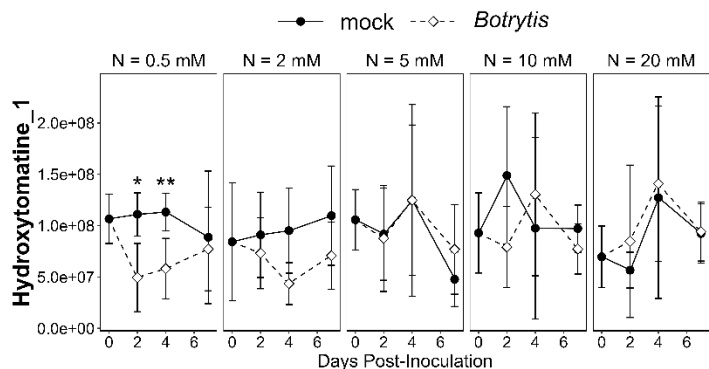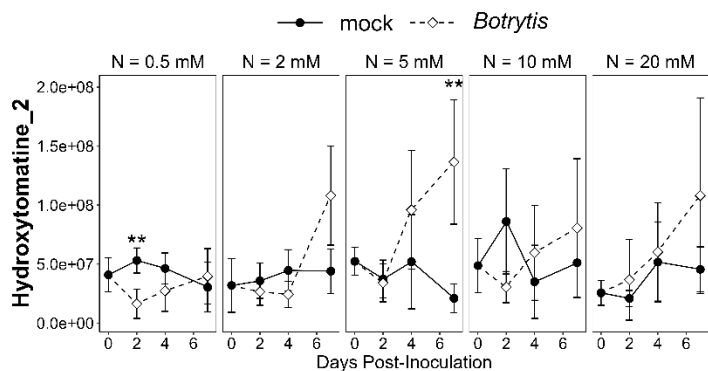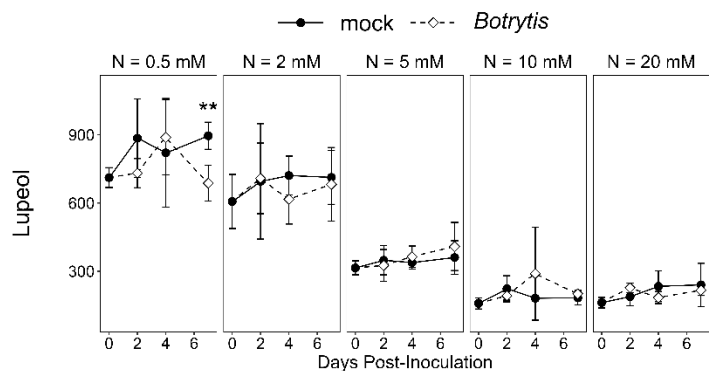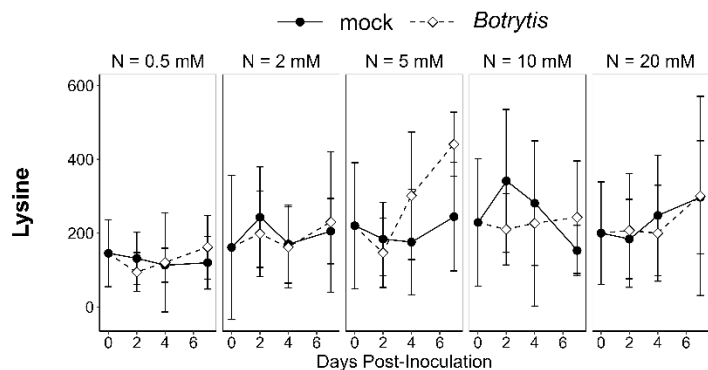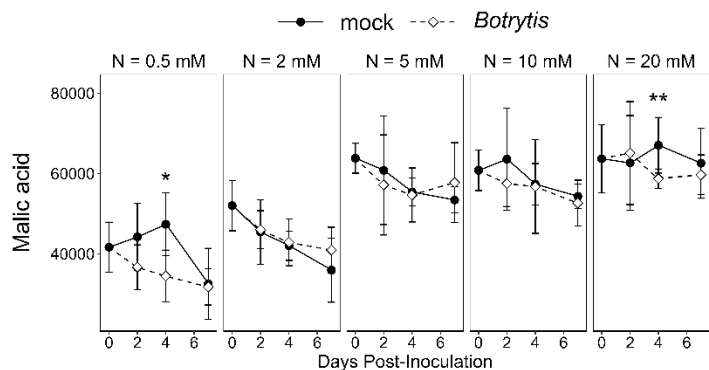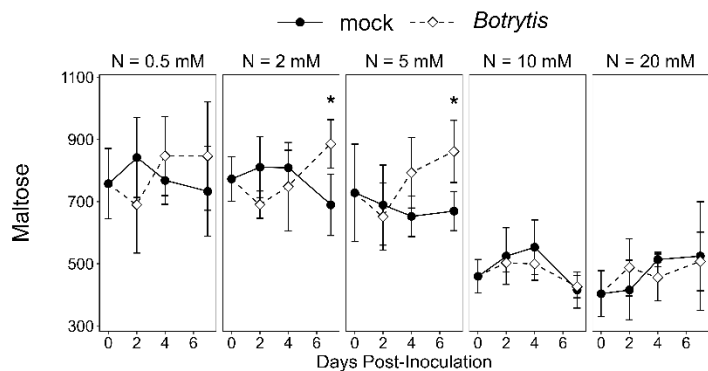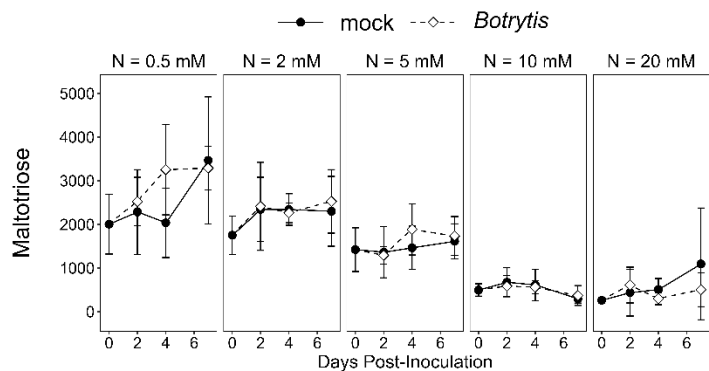

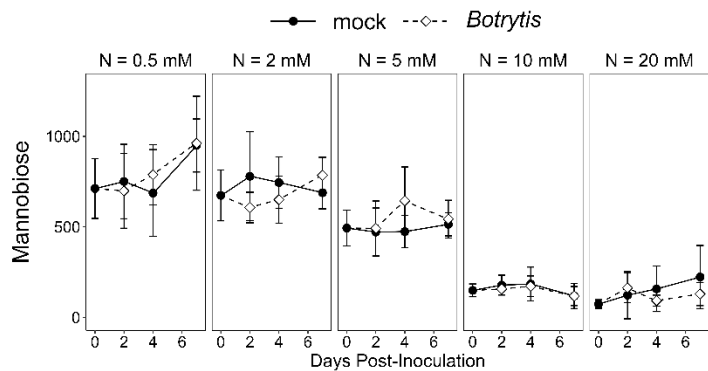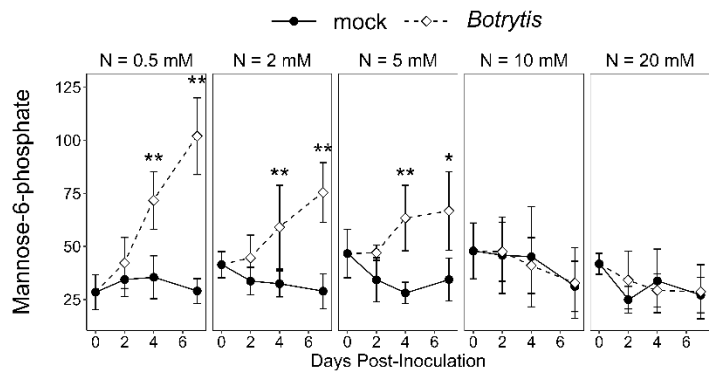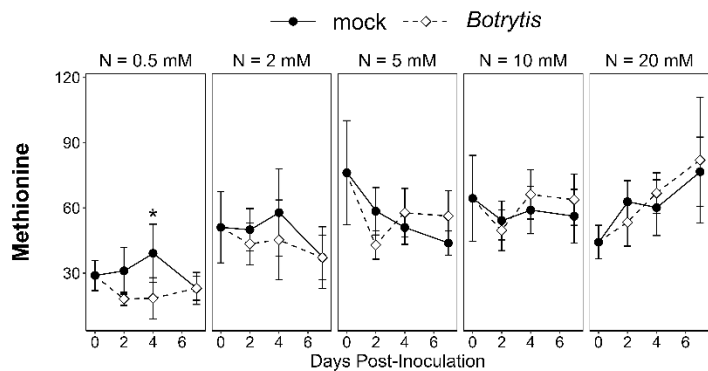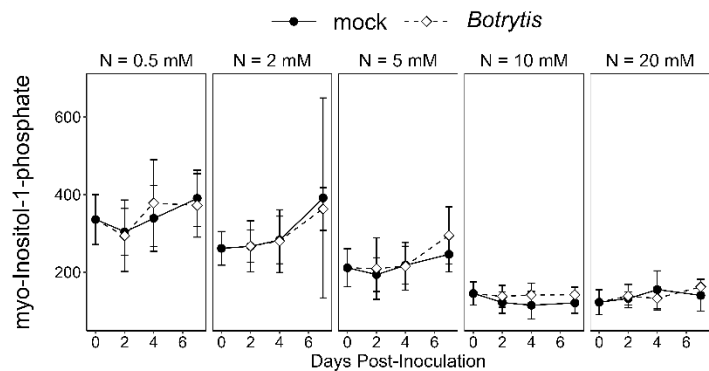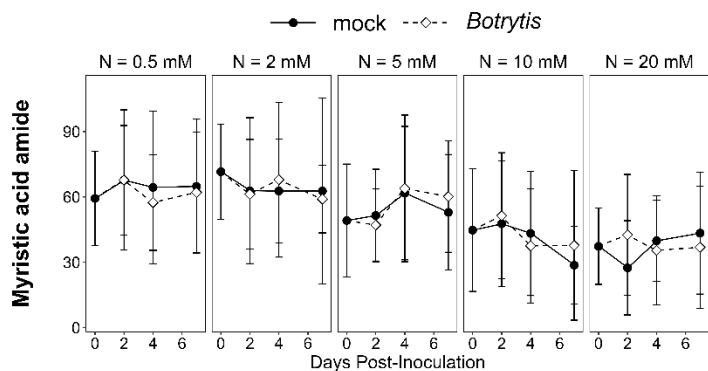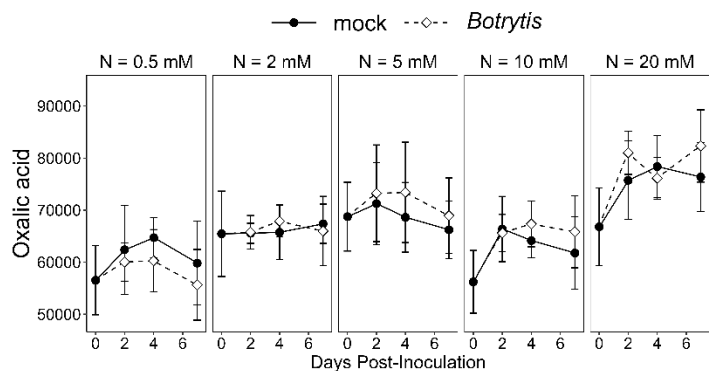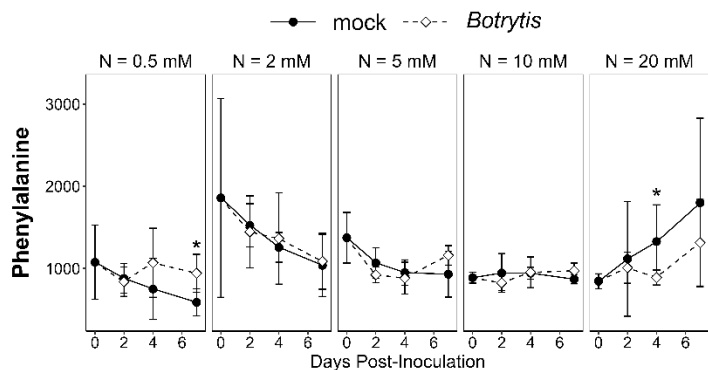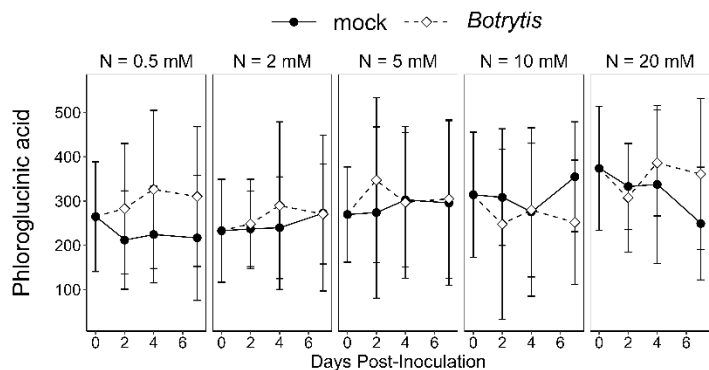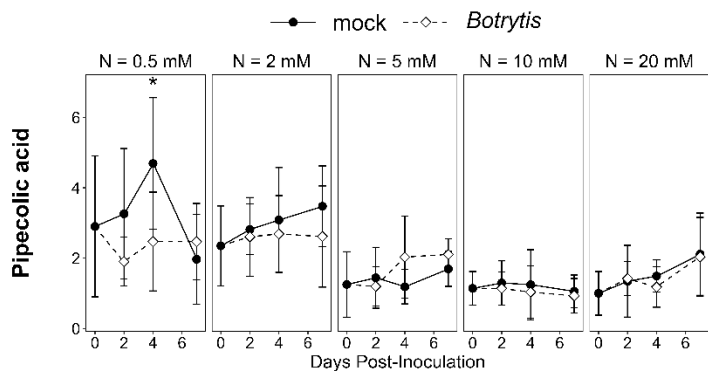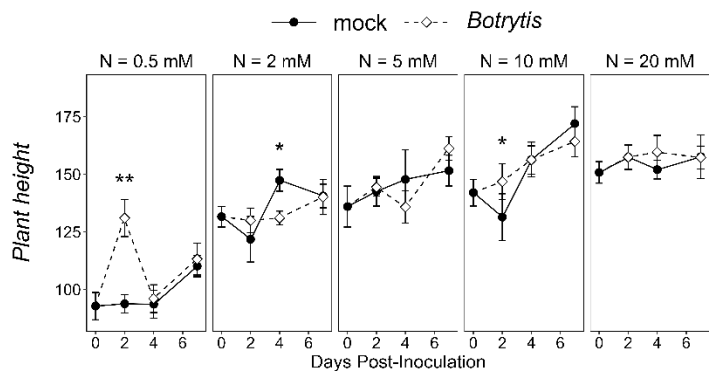

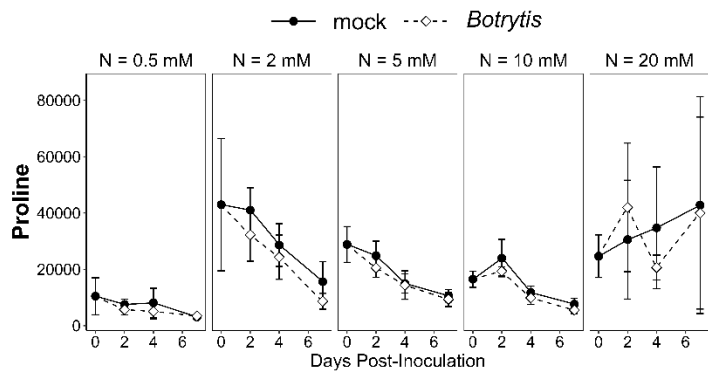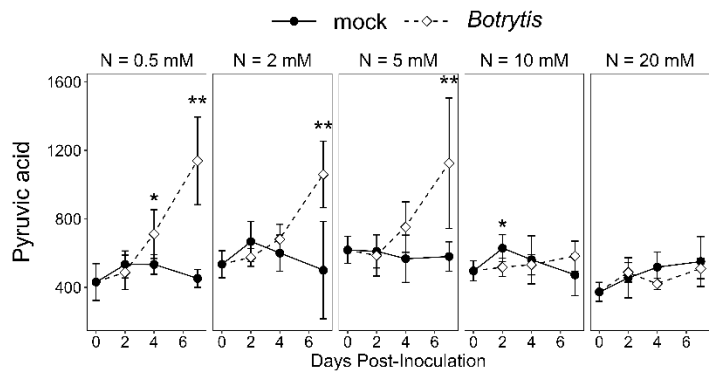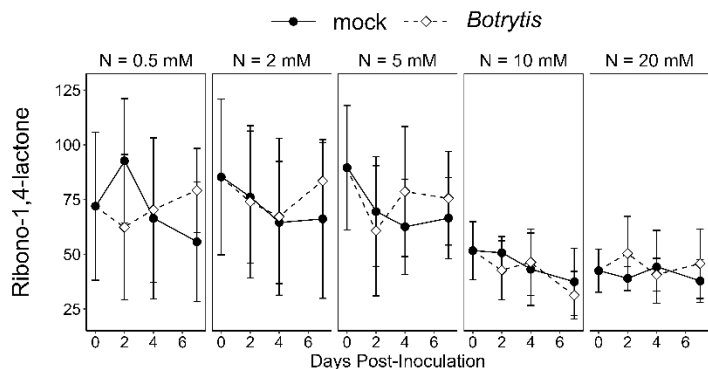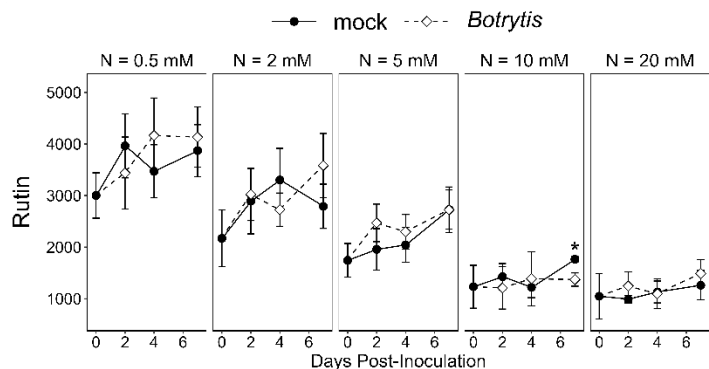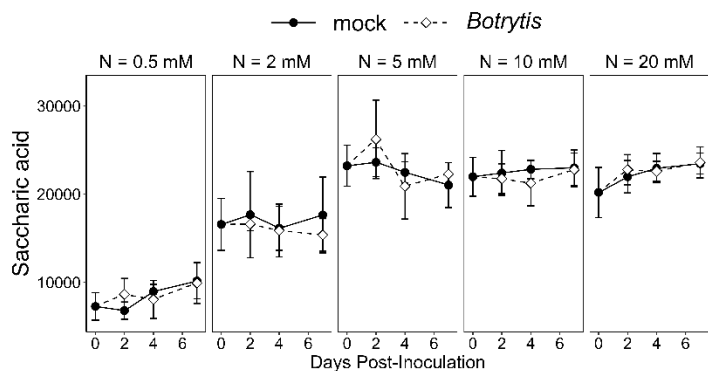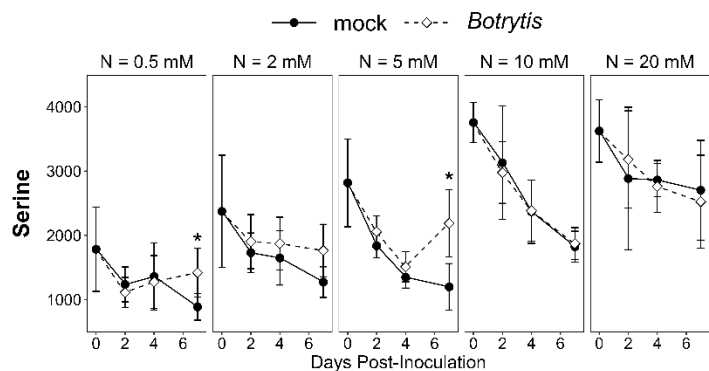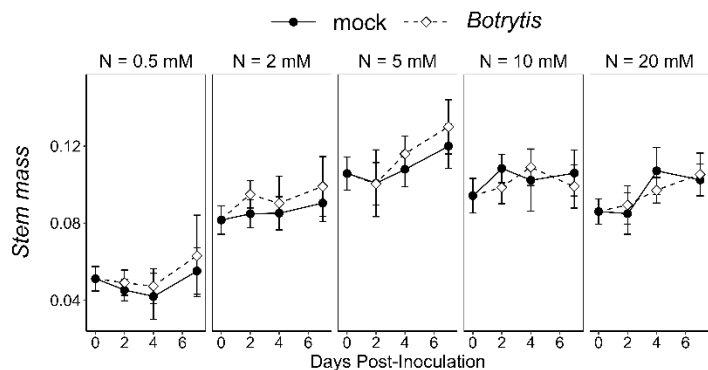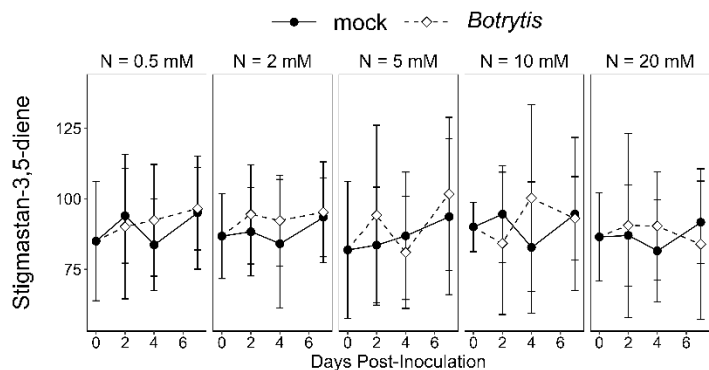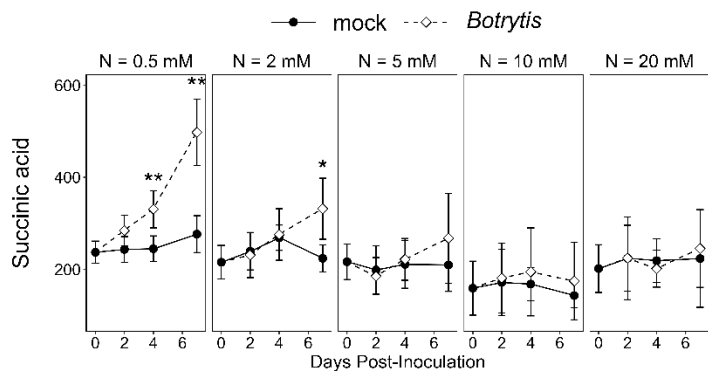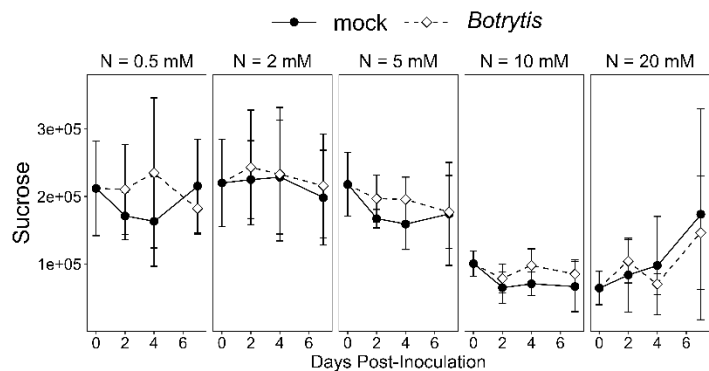



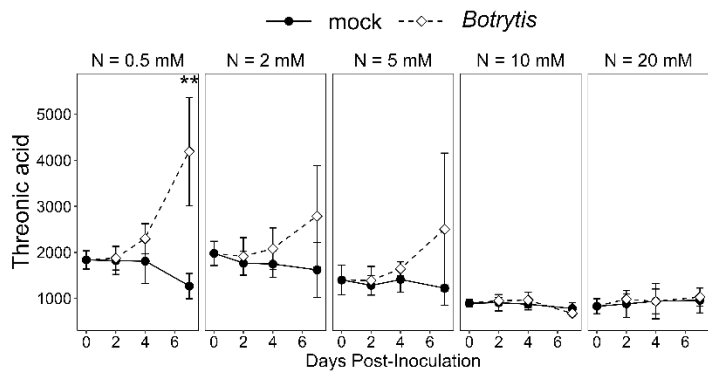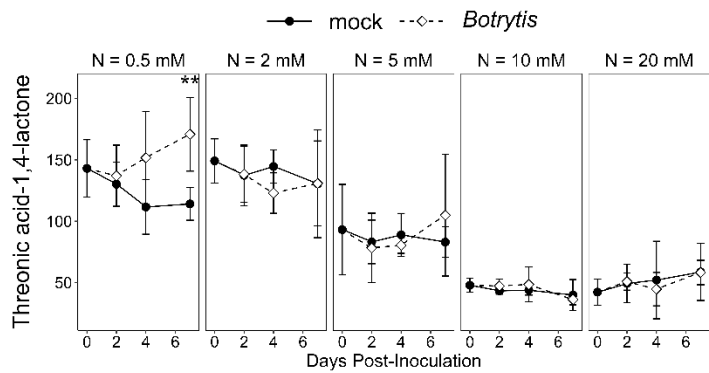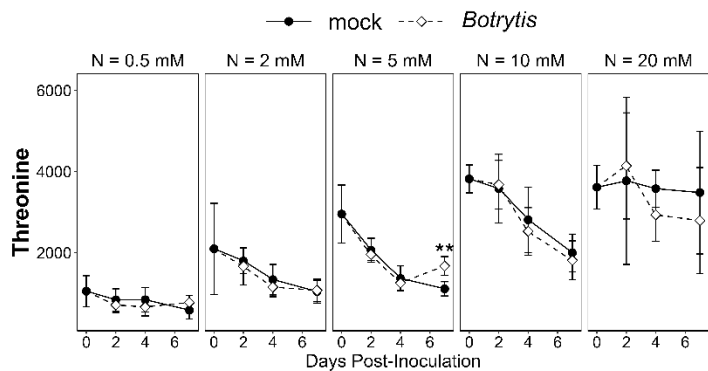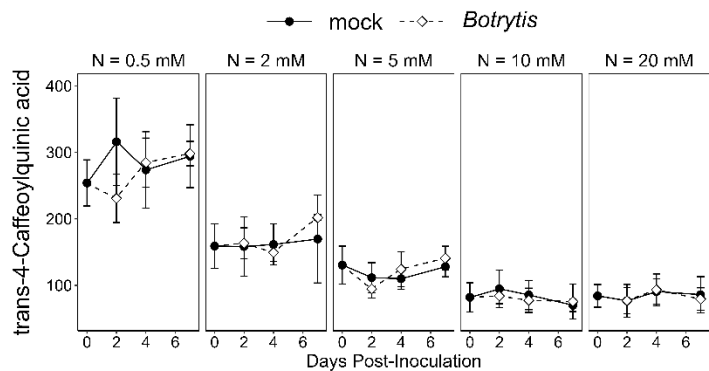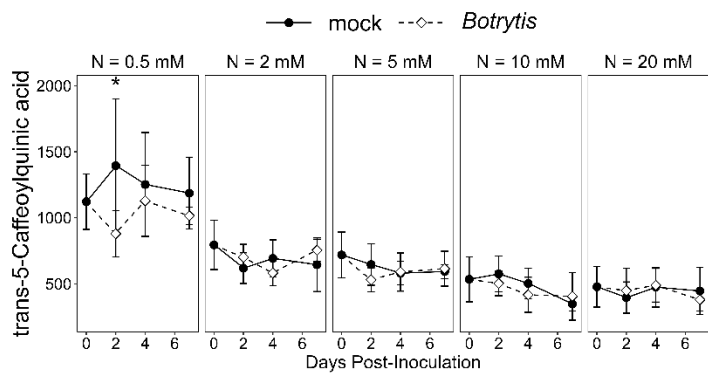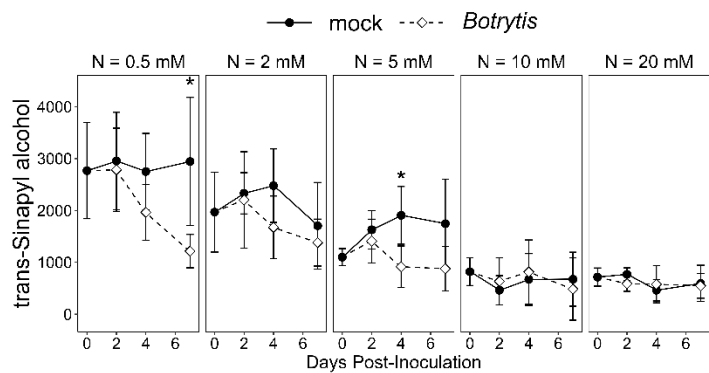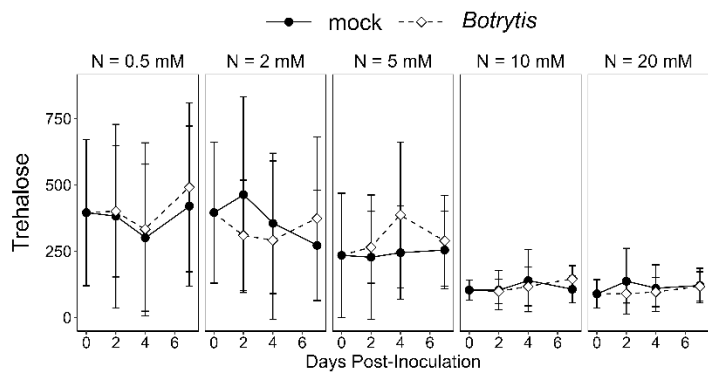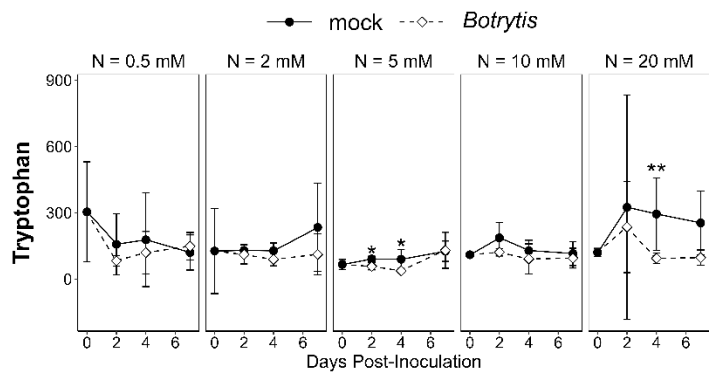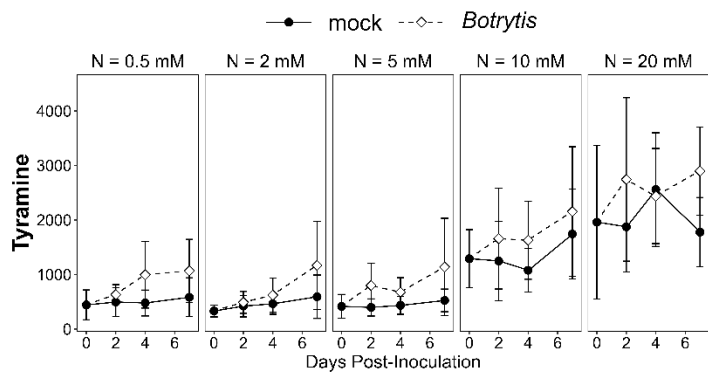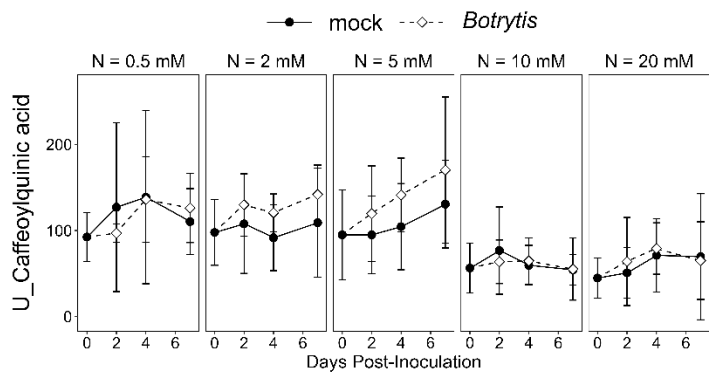

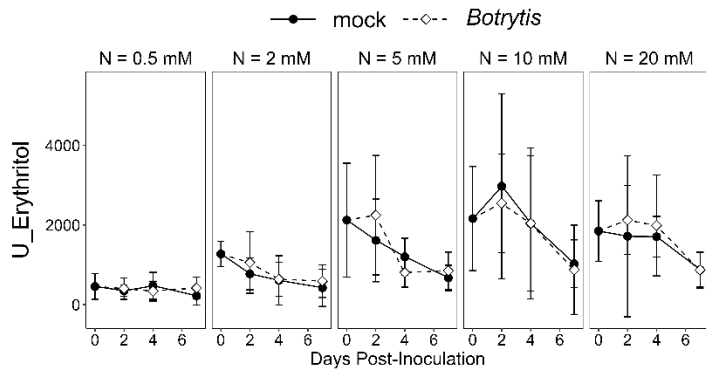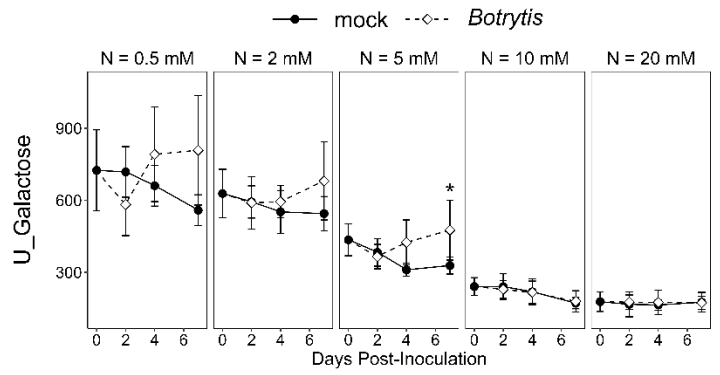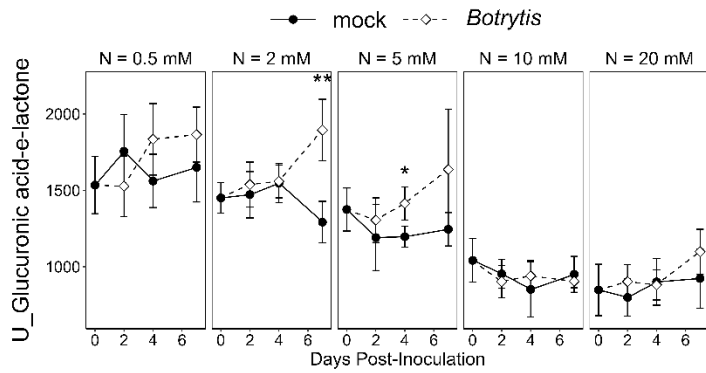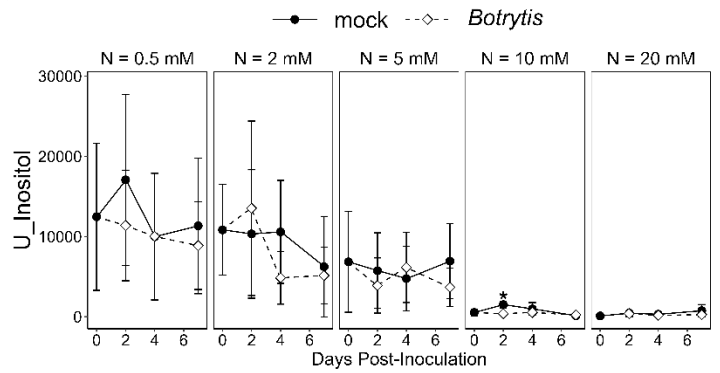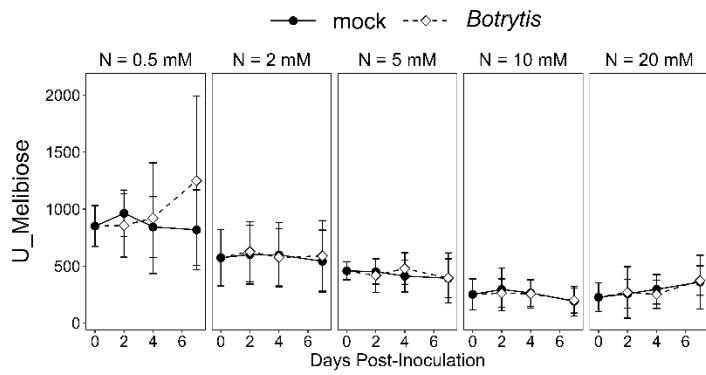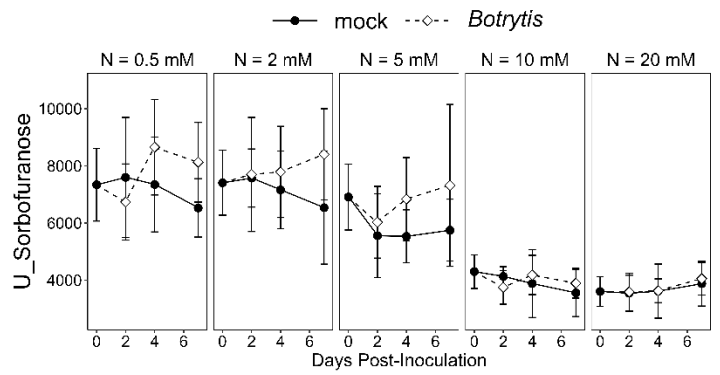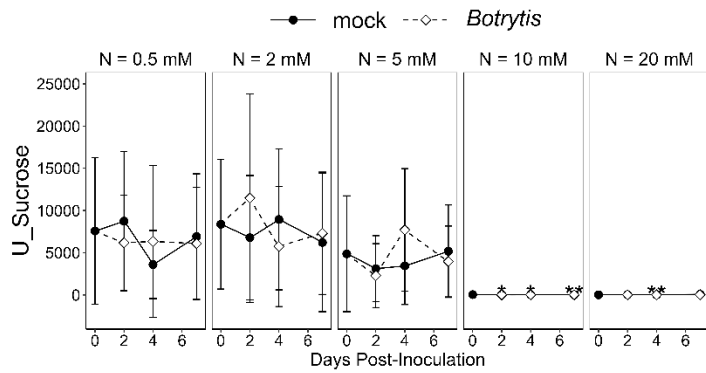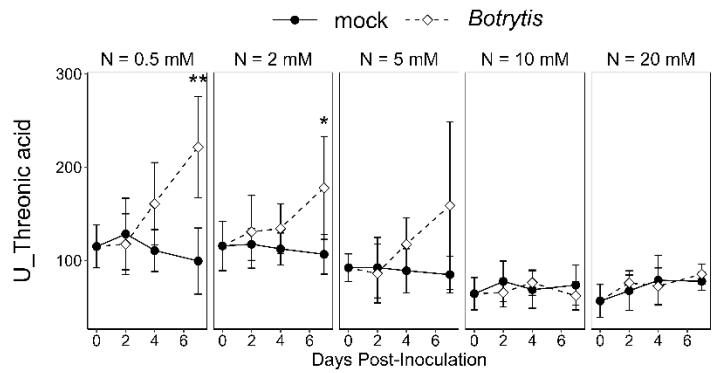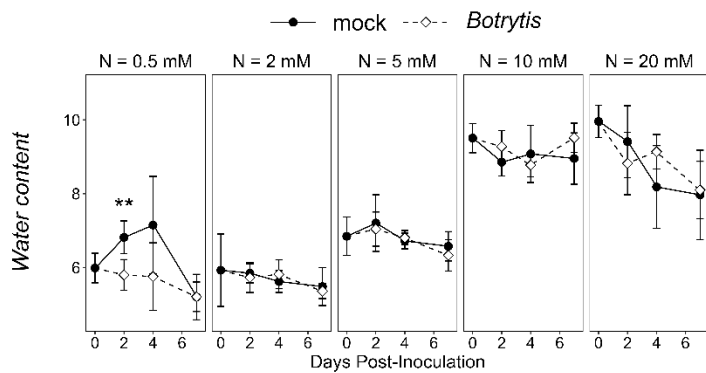

**Supplementary Fig. S3: Impact of nitrogen supply on tomato plant physiology before inoculation (0 dpi).** (a) Water content (Kruskal–Wallis test, p-value = 0,0006494). (b) Plant height (Kruskal–Wallis test, p-value = 0,0008229). (c) Stem mass (Kruskal–Wallis test, p-value = 0,000976). Bars represent the mean of five biological replicates, error bars indicate the standard deviation, and letters indicate significant differences between nitrate treatments according to a Kruskal–Wallis test followed by a Mann–Whitney–Wilcoxon post hoc test (p-value < 0.05).

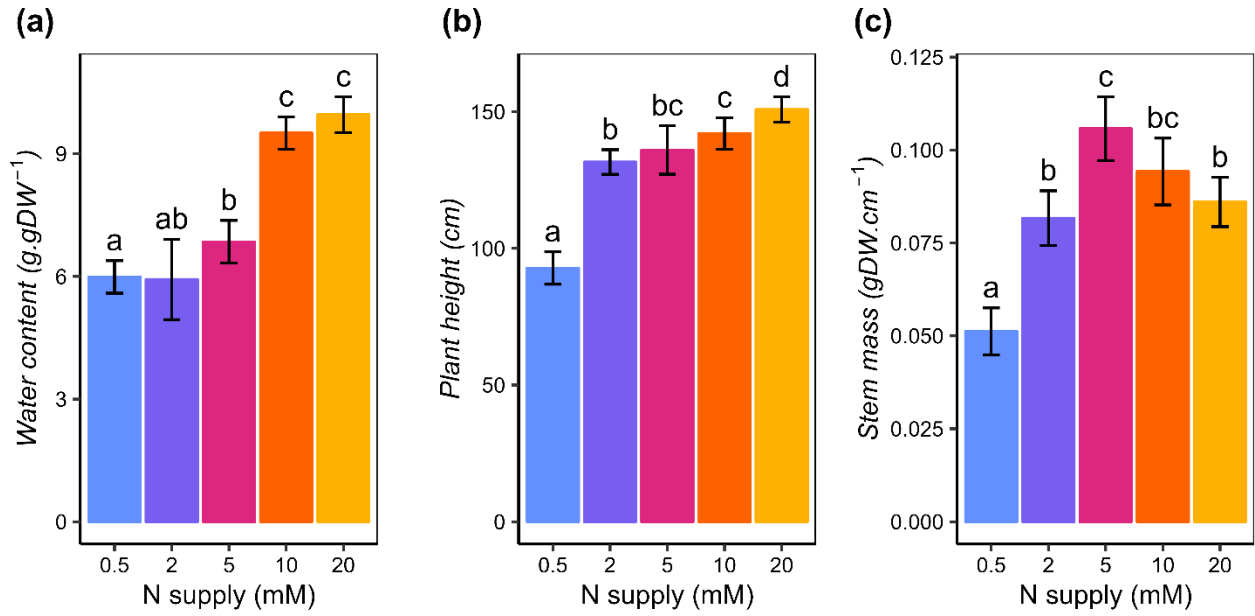

**Supplementary Fig. S4: Variations in metabolic pools in the stem of mock-inoculated tomato plants at different time points.**

Variations are expressed as logarithmic ratios of the average high-N (10 and 20 mM NO<sub>3</sub><sup>-</sup>) to the average low-N (0.5, 2 and 5 mM NO<sub>3</sub><sup>-</sup>), 0 dpi and 7 dpi. The graphs are shown at the same scale, and variables are sorted by decreasing order of values at 0 dpi.

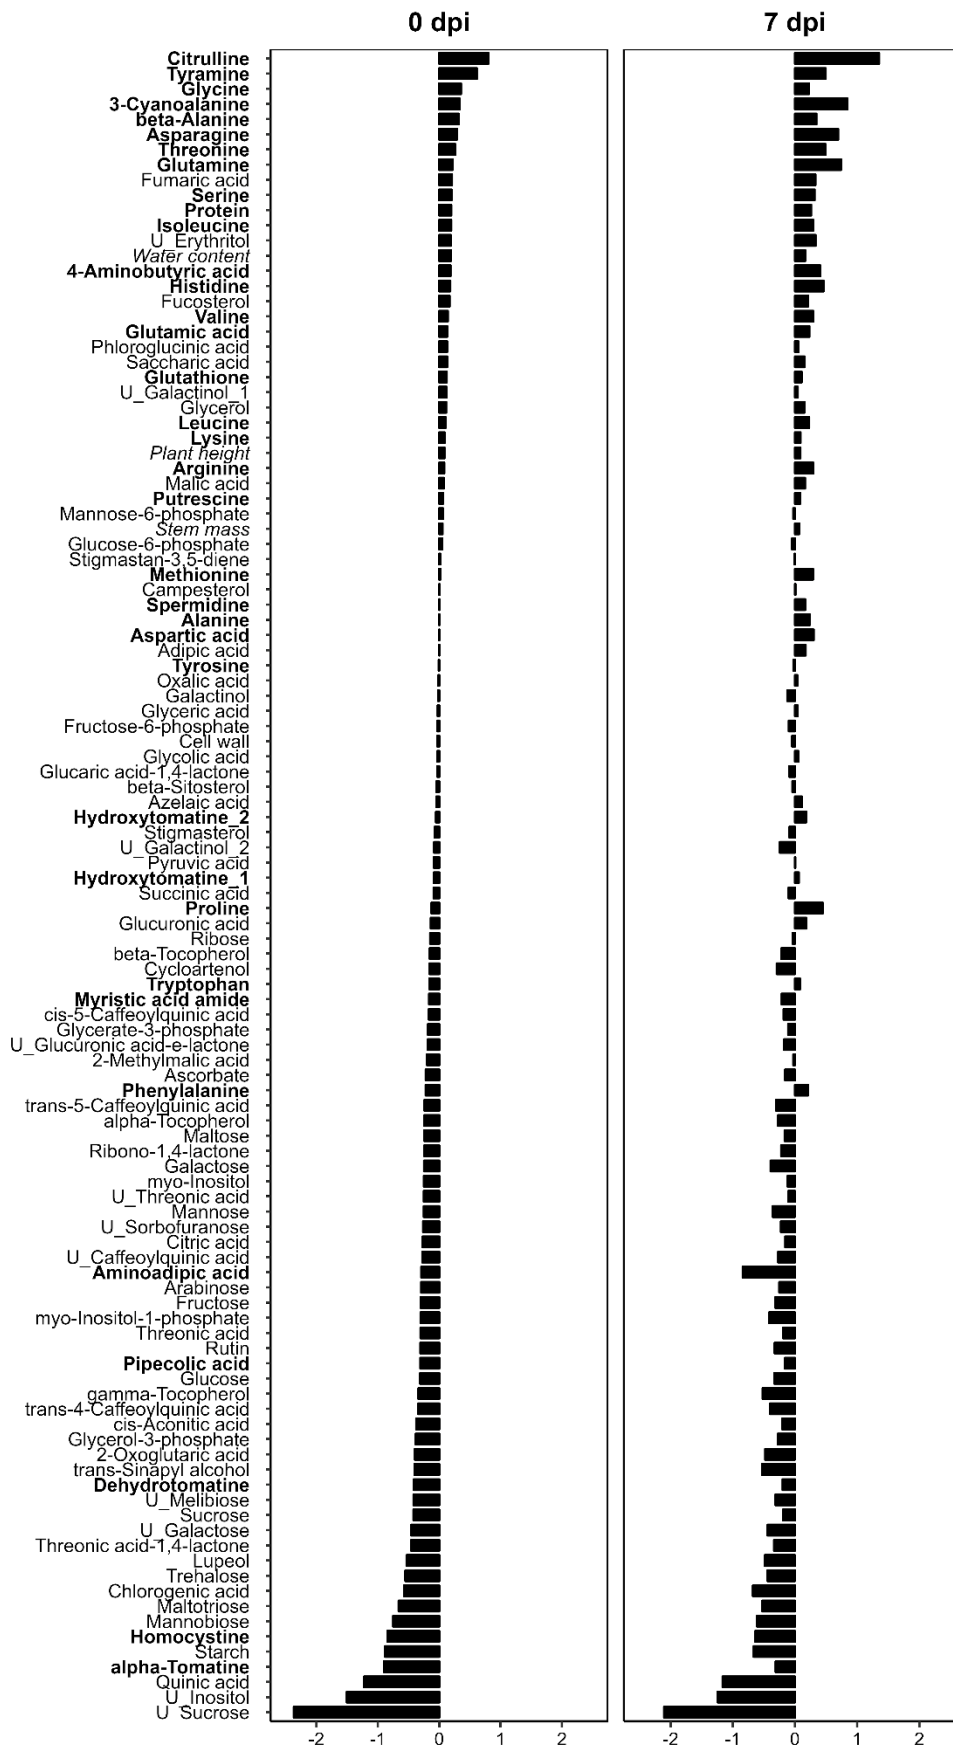

Supplement: 425_2022_4065_MOESM1_ESM.pdf [file 425_2022_4065_MOESM1_ESM.pdf]
